# Supplementary material for: Identification and characterization of a small-molecule metallophore involved in lanthanide metabolism
Source: Proc Natl Acad Sci U S A. 2024 Jul 30;121(32):e2322096121. doi: 10.1073/pnas.2322096121 (PMC11317620; doi:10.1073/pnas.2322096121)
Supplement: Supplementary file 1 — Appendix 01 (PDF) [file pnas.2322096121.sapp.pdf]

## Supporting Information for

### **Discovery and characterization of the first small molecule metallophore involved in lanthanide metabolism**

Alexa M. Zytneck, Sophie M. Gutenthaler-Tietze, Allegra T. Aron, Zachary L. Reitz, Manh Tri Phi, Nathan M. Good, Daniel Petras, Lena J. Daumann, Norma Cecilia Martinez-Gomez.

\*Norma Cecilia Martinez-Gomez, Lena J. Daumann

Email: [cecimartinez@berkeley.edu](mailto:cecimartinez@berkeley.edu), [lena.daumann@hhu.de](mailto:lena.daumann@hhu.de)

#### **This PDF file includes:**

Supporting text  
Figures S1 to S13  
Tables S1 to S2

## Supporting Information Text

### Methods

**Identification of methylolanthanin at analytical scale from crude extracts.** ESI parameters were set to the following: (positive mode) Gas Temp: 250 °C, Drying Gas: 11 L/min, Nebuliser 45 psi, Sheath Gas Temp 350 °C, Sheath Gas Flow 12 L/min; VCap 3500 V, Fragmentor 100 V, Skimmer 65 V, Oct 1 RF Vpp 750 V; mass range: 100-1700; rate 5 spectra/s; time 200 ms/spectrum; transients/spectrum 2641; Reference masses used: 121.0509 and 922.0098; (negative mode) Gas Temp: 275 °C, Drying Gas: 11 L/min, Nebuliser 35 psi, Sheath Gas Temp 350 °C, Sheath Gas Flow 12 L/min; VCap 3000 V, Fragmentor 100 V, Skimmer 65 V, Oct 1 RF Vpp 750 V; rate 5 spectra/s; time 200 ms/spectrum; transients/spectrum 2677; Reference masses used: 112.9855 and 1033.9881.

MS/MS settings for iterative aMS/MS were the following and were measured from 2 to 22 min: Spectral Parameters: (MS 100-1700 m/z; rate 4 spectra/s; time 250; transients/spectrum 3330; MS/MS 50-1000 m/z, rate 4, time 250, transients/spectrum 3211; isolation width ~1.2 m/z); cycle time 0.85 seconds

Collision Energy - fixed: 10, 20 and 40 V; Precursor Selection I : 2 per cycle; Threshold 2000 counts (relative Threshold 0.01%); Active Exclusion after 2 Spectra, released after 0.1 min; (the reference molecules were excluded); Settings for iterative MS/MS: mass tolerance +/- 20 ppm; retention time exclusion tolerance +/-0.2 min; Precursor Selection II: Isotope Model: unbiased; Charge State selection: 1, 2, Unk; Abundance Dependent Accumulation - Scan Speed varied based on precursor abundance.

**Solid phase extraction for Q Exactive HF.** 50 mL of lyophilized supernatant were reconstituted in 6 mL of 3% methanol/LCMS grade water and was extracted onto HLB cartridges (MN Chromabond; 60 µm, 500 mg). HLB cartridges were pre-activated with methanol (2x3 mL), then were washed with water + 3% methanol (2x3 mL). Samples were loaded dropwise onto SPE cartridges before cartridges were washed with water + 3% methanol (2x3 mL). Then samples were eluted stepwise into 2 mL of 50% methanol, 2 mL of 80% methanol, 2 mL of 100% methanol. Samples were weighed and reconstituted with 100 µL 80% methanol/20% water.

**UHPLC-MS/MS on Q Exactive HF.** For data-dependent UHPLC-MS/MS analysis, 5 µL of sample were injected per run. A C18 EVO porous core column (Kinetex C18, 50 × 2 mm, particle size of 1.8 µm, pore size of 100 Å, Phenomenex) was used for reversed-phase chromatography. A Vanquish high-pressure binary gradient system couple to a Q Exactive HF mass spectrometer and method according to Stincone *et al.* was used. The mobile phase consisted of solvent A (water+ 0.1% formic acid (FA)) and solvent B (acetonitrile (ACN) + 0.1% FA), and the flow rate was 0.5 ml min<sup>-1</sup>. After injection, the samples were eluted with the linear gradient: 0–8 min 5–50% B, followed an increase from 50–99 % B from 8–12 min, and by a 3-min washout phase at 99% B and a 3-min re-equilibration phase at 5% B. Data-dependent acquisition (DDA) of MS/MS spectra was performed in positive mode. ESI parameters were set to a sheath gas flow of 50AU, auxiliary gas flow of 12 AU, sweep gas flow of 1AU and auxiliary gas temperature of 400 °C, while the spray voltage was set to 3.5 kV, the inlet capillary to 250 °C. The MS scan range was set to 150–1,500 m/z with a resolution at m/z 200 (Rm/z 200) of 120,000. The maximum ion injection time was set to 100 ms with an automated gain control (AGC) target of  $1.0 \times 10^6$ . Up to five MS/MS spectra per MS1 survey scan were recorded in DDA mode with Rm/z 200 of 15,000 with one micro-scan. The maximum ion injection time for MS/MS scans was set to 50 ms with an AGC target of  $5 \times 10^5$  ions. The MS/MS precursor isolation window was set to m/z 1. The normalized collision energy was set to a stepwise increase from 25 to 35 to 45% with z = 1 as default charge state. MS/MS scans were triggered at the apex of chromatographic peaks within 2 to 15 s from their first occurrence. Dynamic precursor exclusion was set to 5 s. Ions with unassigned charge states were excluded from MS/MS acquisition as well as isotope peaks.

**Feature based molecular networking.** The .csv and .mgf file outputs from Feature finding in MZmine were directly uploaded to the feature based molecular networking workflow in GNPS for spectral networking and spectral library matching (gnps.ucsd.edu). For spectral library matching and spectral networking, the minimum cosine score to define spectral similarity was set to 0.7. The Precursor and Fragment Ion Mass Tolerances were set to 0.02 Da and Minimum Matched Fragment Ions to 4, Minimum Cluster Size to 1 (MS Cluster off). When Analog Search was performed the maximum mass difference was set to 100 Da. The GNPS job for positive analysis can be accessed through the following link: <https://gnps.ucsd.edu/ProteoSAFe/status.jsp?task=def58641630e488985bfbe5a15c94e32>; the negative analysis can be accessed through the following link: <https://gnps.ucsd.edu/ProteoSAFe/status.jsp?task=0478820eab694254b9eba0bbe4de2be6>.

**LC-MS/MS data cleanup and statistics.** The .csv feature tables from Feature finding in MZmine 3 were blank subtracted, imputed, normalized, and scaled using R code available at [https://github.com/allegra-aron/Lanthanophore\\_2023/](https://github.com/allegra-aron/Lanthanophore_2023/). A media blank was used for blank subtraction, specifically features with mean intensity of 30% abundance in the media as compared to samples were removed. Imputation was utilized to remove zero values by replacing them with the limit of detection for the experiment. Normalization was performed by scaling the intensities of all features in a sample by the total ion current (or sum) of the sample (total ion current or TIC normalization). Volcano plots and Kruskal-Wallis analysis followed by pairwise Wilcoxon tests and Benjamini-Hochberg (BH) correction were performed using R code provided in the same location ([https://github.com/allegra-aron/Lanthanophore\\_2023/](https://github.com/allegra-aron/Lanthanophore_2023/)). The blank subtracted, imputed, TIC normalized table was utilized for volcano plots and Kruskal-Wallis analysis. Principal component analysis was performed using the scaled data.

**Concentration determination via qNMR and determination of the extinction coefficient.** <sup>1</sup>H qNMR was measured in 3 mm NMR tubes (*Deutero*, D800-3-7) on a *Bruker* Avance III HD spectrometer equipped with a triple channel cryogenic probe operating at the Larmor frequency of 800 MHz (18.8 T) at 298.15 K. The following acquisition settings were used: spectral width of 12820.5 Hz, 48 scans, acquisition time of 1.278 s, 60 s relaxation delay and 16 k real points. For water suppression the pulse sequence zgesgp was used. A stock solution (10 mg/mL; MW: 130.11 g/mol) in D<sub>2</sub>O (+ 0.03% TMSP, *Deutero*) of the quantitative reference material calcium formate (*Merck*; certified reference material, 99.58%) was gravimetrically prepared (*Mettler Toledo* UMT2 precision scale, Δ=0.1 μg) and diluted 1:10 with D<sub>2</sub>O + 0.03% TMS before it was mixed 1:10 with an aqueous solution with an unknown concentration of methylolanthanin. The equation (1) was used to calculate the concentration (*c<sub>x</sub>*) of methylolanthanin. With *I* standing for integral, *N* for number of atomic nuclei and *P<sub>Std</sub>* for purity (%). The qNMR spectrum and the used integral values are shown in Fig. S8.

$$(1) \quad c_x = \frac{I_x}{I_{Std}} \times \frac{N_{Std}}{N_x} \times c_{Std} \times P_{Std}$$

With this the concentration of the aqueous solution of methylolanthanin was determined and was used to prepare a series of samples in water with known concentration to determine the extinction coefficient (ε) using the *Beer-Lambert* law (Fig. S8). UV-vis spectra were recorded on an *Agilent* Cary 60 spectrometer at 25 °C in *Brand* micro cuvettes (10 mm pathlength; 70-500 μL) with a scan rate of 600 nm/min in 1 nm steps. All spectra were measured using the automatic baseline correction after measuring the used solvent. In order to determine the extinction coefficient, the absorbance at 251 nm was plotted against the concentration which gave an extinction coefficient of 24.3 ± 0.3 mM<sup>-1</sup>cm<sup>-1</sup>.

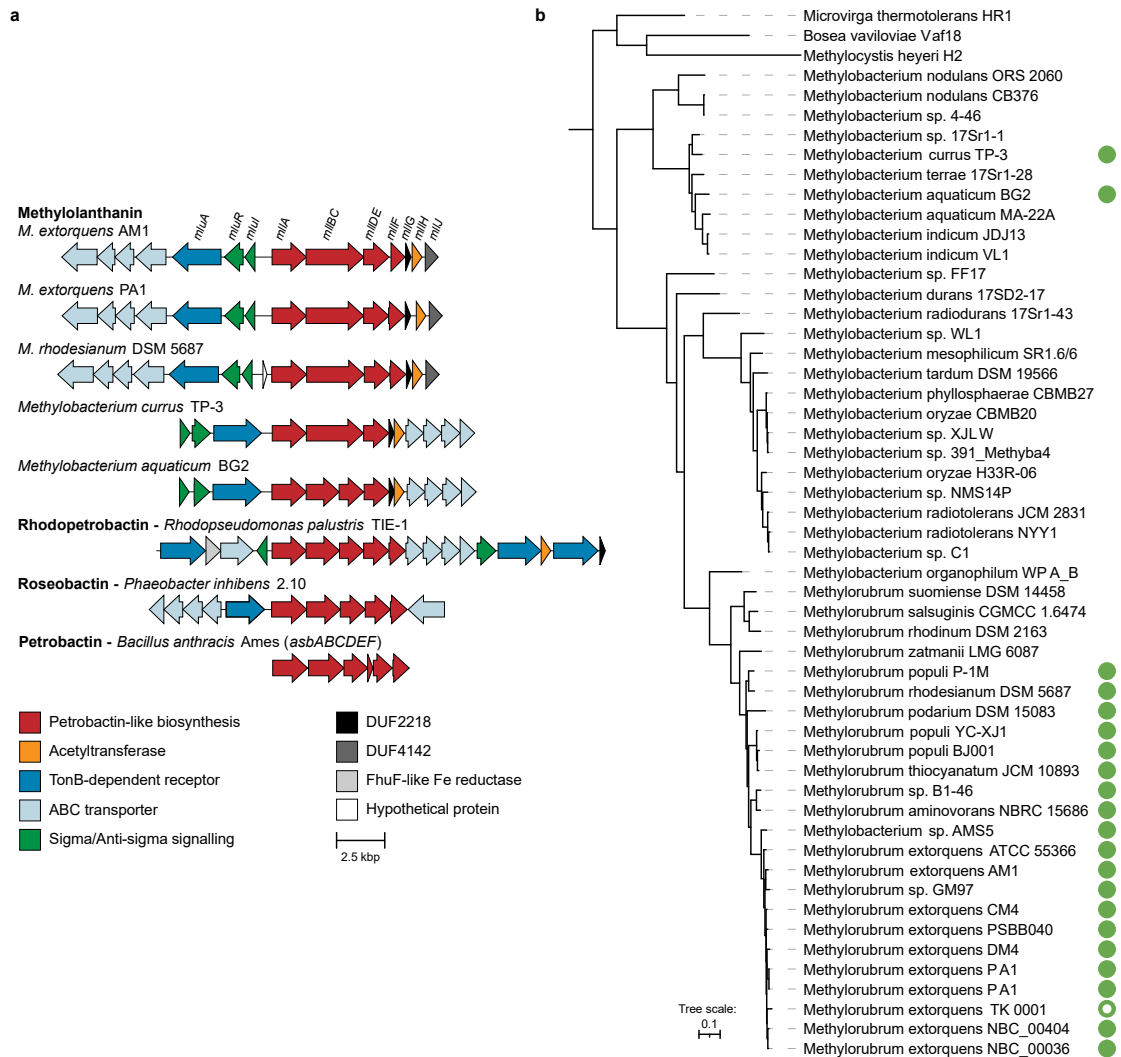

**Figure S1. Comparative genomics of *mll* and prevalence in *Methylobacteriaceae*.** **a**, Comparison of *mll* from *Methylobacterium extorquens* AM1 against homologous clusters, including BGCs encoding the characterized siderophores rhodopetrobactin, roseobactin, and petrobactin. Genes are drawn to scale. **b**, A maximum-likelihood phylogenetic species tree of *Methylobacterium* and *Methylobacterium* strains, annotated by the presence of a BGC homologous to *mll* (filled green circle). The *asbC* homolog in *M. extorquens* TK 0001 (open circle) did not match the AMP-binding domain (PF00501) and may be non-functional. Assembly accession numbers are provided in Supplementary Table 1.

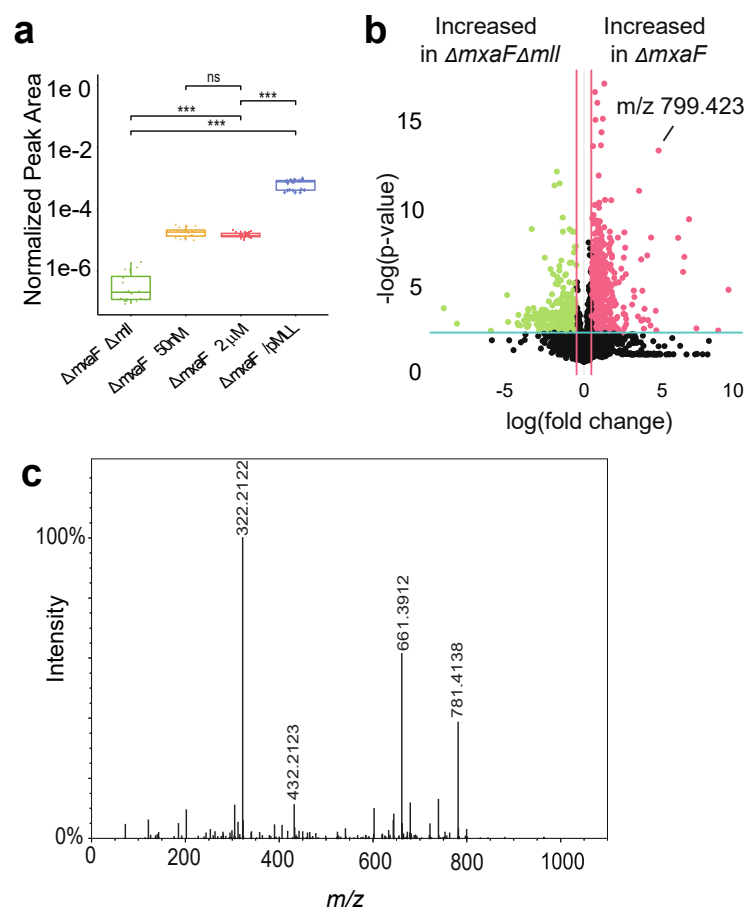

**Figure S2. Statistical analysis and MS/MS of methylolanthanin.** **a**, Boxplots of the normalized peak area of feature  $m/z$  799.4232 in positive mode reveal significant differences between  $\Delta mxaF$  and  $\Delta mxaF\Delta mll$  and between  $\Delta mxaF$ /pMLL but differences between  $\Delta mxaF$  2  $\mu M$  Nd and  $\Delta mxaF$  50 nM were not significant. Statistics were calculated with  $n=5$  per group. Kruskal-Wallis, followed by pairwise Wilcoxon tests and Benjamini-Hochberg (BH) correction, was used ( $***p < 0.001$ ). Upper and lower whiskers extend to closest value to  $\pm 1.5 \times IQR$ . **b**,  $m/z$  799.4232 is one of the most significantly increased features in  $\Delta mxaF$  versus  $\Delta mxaF\Delta mll$  supernatants when analyzed using ESI-UPLC-MS/MS in negative ionization mode. Volcano plot analysis was performed with  $n=20$  per group. Fold changes 0.5 and a  $p$ -value  $< 0.01$  are highlighted. **c**, The MS/MS spectrum in positive mode of the 1+ methylolanthanin.

**a**

| 1H NMR chemical shifts (ppm) for Methylolanthanin |                                                |                                    |                                                |                    |
|---------------------------------------------------|------------------------------------------------|------------------------------------|------------------------------------------------|--------------------|
| C/H                                               | $\delta$ H (D <sub>2</sub> O)                  | Mult. (J in Hz)                    | $\delta$ C (D <sub>2</sub> O)                  | HMBC               |
| 1                                                 | -                                              | -                                  | 162.6                                          |                    |
| 2                                                 | 6.94                                           | 8.6 (d)                            | 118.3                                          | C1, C2, C4         |
| 3                                                 | 7.67                                           | 8.6 (d)                            | 132.3                                          | C1, C3, C5         |
| 4                                                 | -                                              | -                                  | 128.7                                          |                    |
| 5                                                 | -                                              | -                                  | 173.4                                          |                    |
| 6                                                 | -                                              | -                                  | -                                              | -                  |
| 7                                                 | 3.36, 3.38                                     | m                                  | 48.3, 42.2                                     | C5, C8, C9         |
| 8/9                                               | 1.47, 1.57; 1.42, 1.58                         | m, m                               | 27.1, 28.6                                     |                    |
| 10                                                | 3.29, 3.33                                     | m                                  | 51.8                                           | C11                |
| 11                                                | 3.25, 3.30                                     | m                                  | 48.6                                           |                    |
| 12                                                | -                                              | -                                  | 176.5                                          |                    |
| 13                                                | 2.07, 2.07                                     | s, s                               | 23.3                                           | C12                |
| 14                                                | 1.48, 1.56                                     | m                                  | 27.2, 27.3                                     |                    |
| 15                                                | 1.39, 1.43                                     | m                                  | 28.7, 28.6                                     |                    |
| 16                                                | 3.08, 3.09                                     | m                                  | 41.7                                           | C18                |
| 17                                                | -                                              | -                                  | -                                              |                    |
| 18                                                | -                                              | -                                  | 175.1                                          |                    |
| 19                                                | HA 2.66<br>HB 2.56                             | 14.4 (d, 4 AB systems overlapping) | 47.2                                           | C18, C19, C20, C21 |
| 20                                                | -                                              | -                                  | 77.9                                           |                    |
| 21                                                | -                                              | -                                  | 182.0                                          |                    |
| C/H                                               | $\delta$ H (H <sub>2</sub> O/D <sub>2</sub> O) | Mult. (J in Hz)                    | $\delta$ C (H <sub>2</sub> O/D <sub>2</sub> O) | HMBC               |
| 6                                                 | 8.31, 8.28                                     | 6.3 (t), 6.2 (t)                   | -                                              |                    |
| 17                                                | 7.81, 7.80                                     | 5.9 (t), 6.0 (t)                   | -                                              |                    |
| 19                                                | HA 2.68<br>HB 2.57                             | 14.7 (d, 4 AB systems overlapping) | 47.2                                           | C18, C19, C20, C21 |

**b**

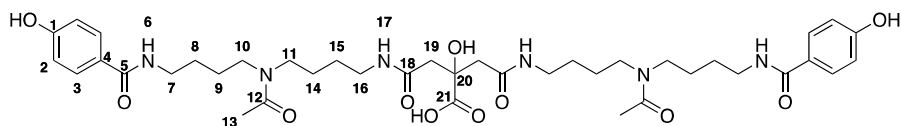

**Figure S3. NMR assignments of methylolanthanin. a,** <sup>1</sup>H NMR chemical shifts (ppm) for methylolanthanin. **b,** Structure of methylolanthanin with numbering for NMR assignments.

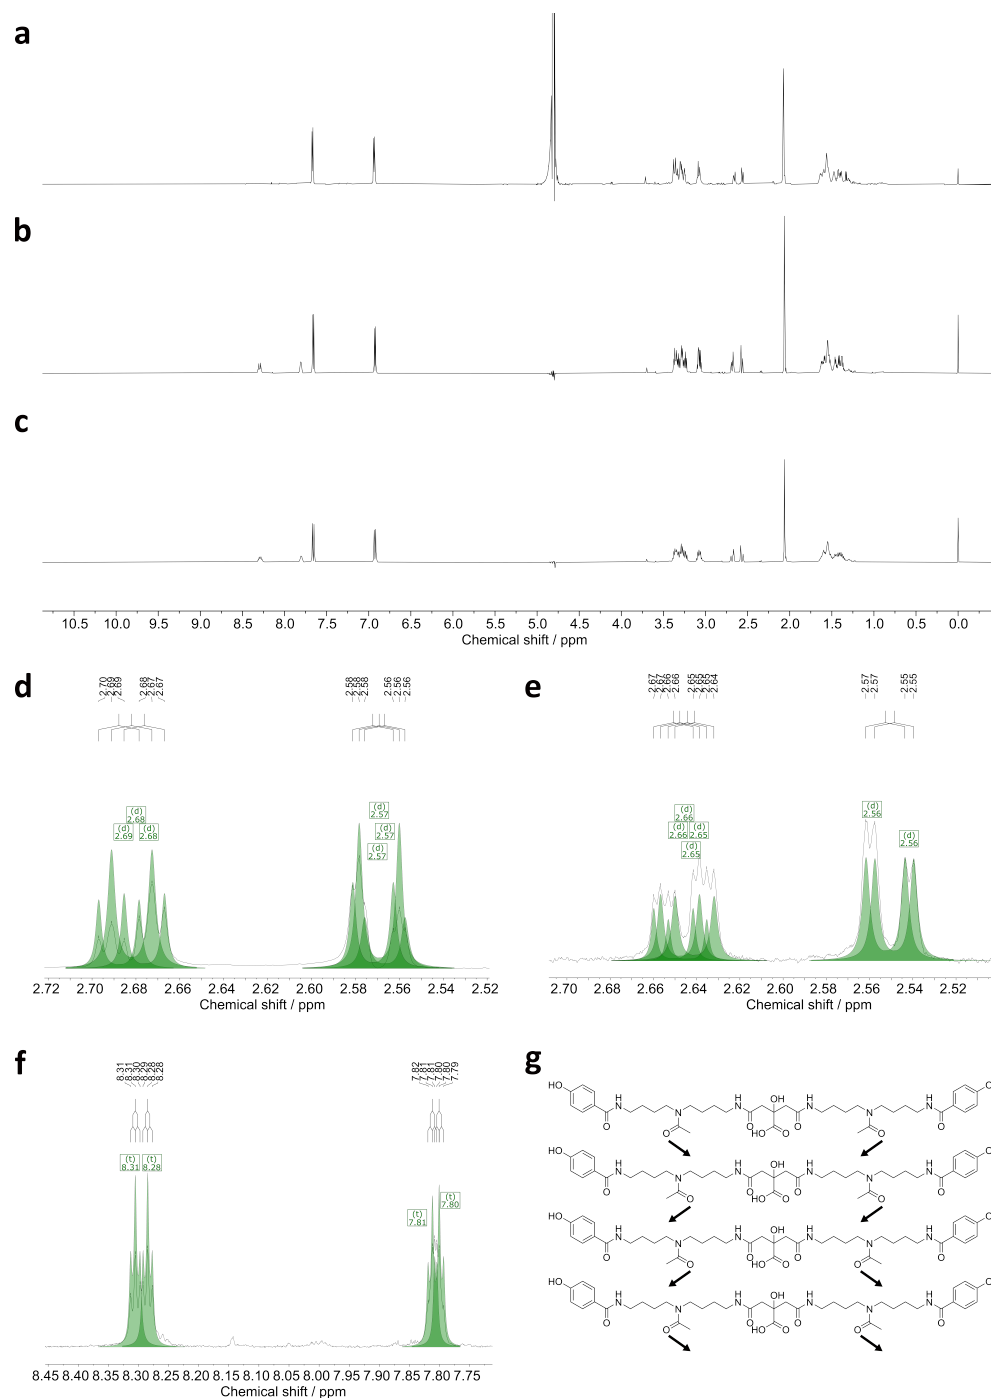

**Figure S4.  $^1\text{H}$  NMR spectra of methylolanthanin.** **a**, in  $\text{D}_2\text{O}$  (800 MHz), **b**, in  $\text{H}_2\text{O}/\text{D}_2\text{O}$  (9:1) (800 MHz) and **c**, in  $\text{H}_2\text{O}/\text{D}_2\text{O}$  (9:1) (500 MHz). **d**, Deconvoluted signals observed for the four overlapping AB spin systems of the diastereotopic methylene signals of the central citric acid moiety of methylolanthanin in  $\text{D}_2\text{O}/\text{H}_2\text{O}$  (800 MHz) and **e**, in  $\text{D}_2\text{O}$  (800 MHz). **f**, deconvoluted signals observed for the secondary amine protons of methylolanthanin in  $\text{D}_2\text{O}/\text{H}_2\text{O}$  (800 MHz) caused by the proximity to differently orientated acyl groups. **g**, Molecular structures of the four possible conformers of methylolanthanin causing the signal splitting.

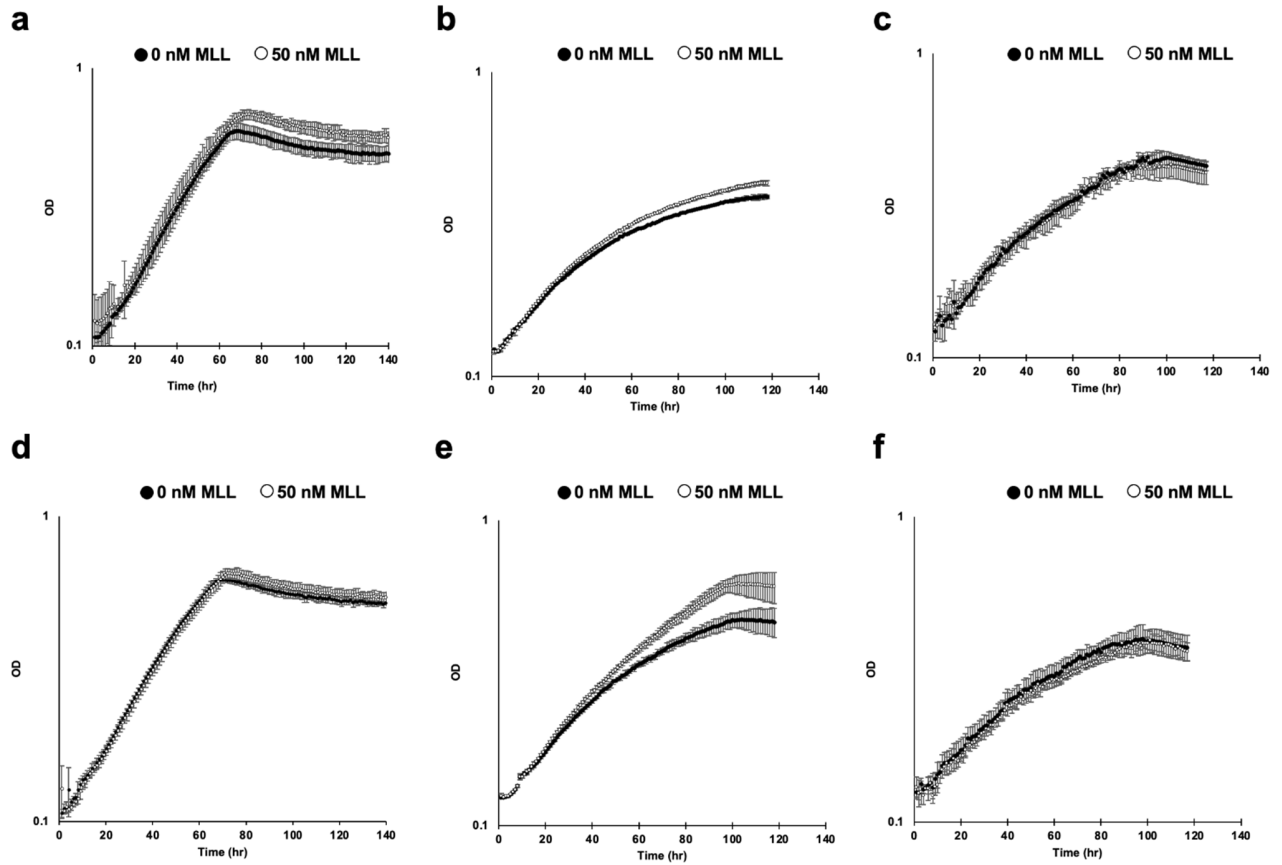

**Figure S5. Exogenous methylolanthanin affects growth of  $\Delta mxaF$  and  $\Delta mxaF\Delta mll$ .** **a**, Addition of methylolanthanin to  $\Delta mxaF$  cultures (empty circles) compared to cultures grown without methylolanthanin (filled circles) when grown with 2  $\mu\text{M}$   $\text{NdCl}_3$ . **b**, Addition of methylolanthanin to  $\Delta mxaF$  cultures (empty circles) compared to cultures grown without methylolanthanin (filled circles) when grown with 50 nM  $\text{NdCl}_3$ . **c**, Addition of methylolanthanin to  $\Delta mxaF$  cultures (empty circles) compared to cultures grown without methylolanthanin (filled circles) when grown with 1  $\mu\text{M}$   $\text{Nd}_2\text{O}_3$ . **d**, Addition of methylolanthanin to  $\Delta mxaF\Delta mll$  cultures (empty circles) compared to cultures grown without methylolanthanin (filled circles) when grown with 2  $\mu\text{M}$   $\text{NdCl}_3$ . **e**, Addition of methylolanthanin to  $\Delta mxaF\Delta mll$  cultures (empty circles) compared to cultures grown without methylolanthanin (filled circles) when grown with 50 nM  $\text{NdCl}_3$ . **f**, Addition of methylolanthanin to  $\Delta mxaF\Delta mll$  cultures (empty circles) compared to cultures grown without methylolanthanin (filled circles) when grown with 1  $\mu\text{M}$   $\text{Nd}_2\text{O}_3$ . Individual data points represent the mean of three replicates and error bars represent standard deviation.



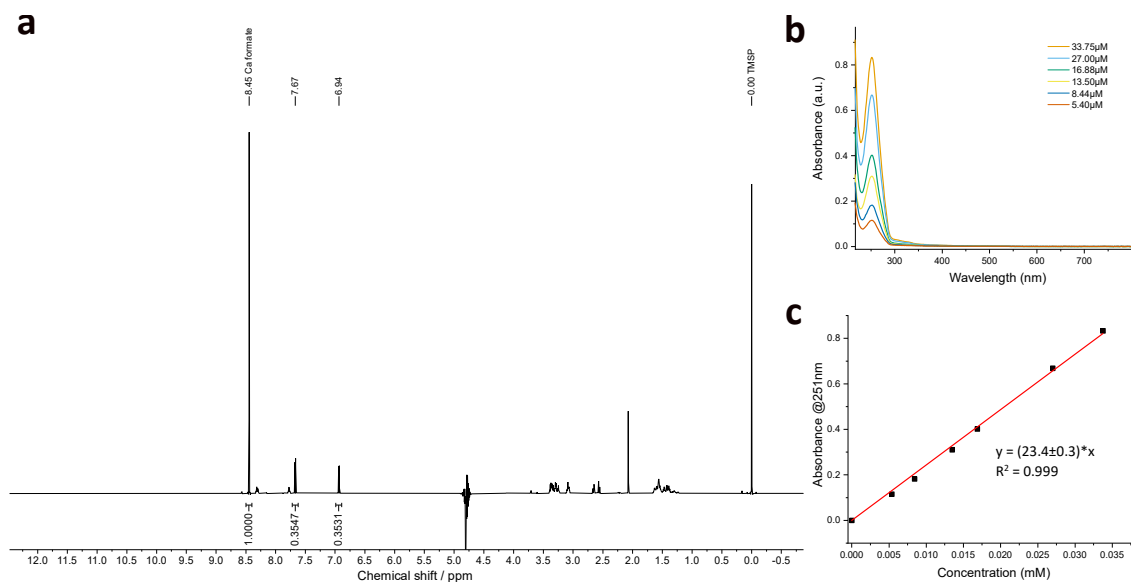

**Figure S8. qNMR and extinction coefficient determination of methylolanthanin. a,** qNMR of methylolanthanin in H<sub>2</sub>O/D<sub>2</sub>O (9:1) (800MHz). **b,** UV-vis spectra of methylolanthanin at different concentrations in water. **c,** Concentration of methylolanthanin plotted against the absorbance at 251 nm for determination of the extinction coefficient from regression line.

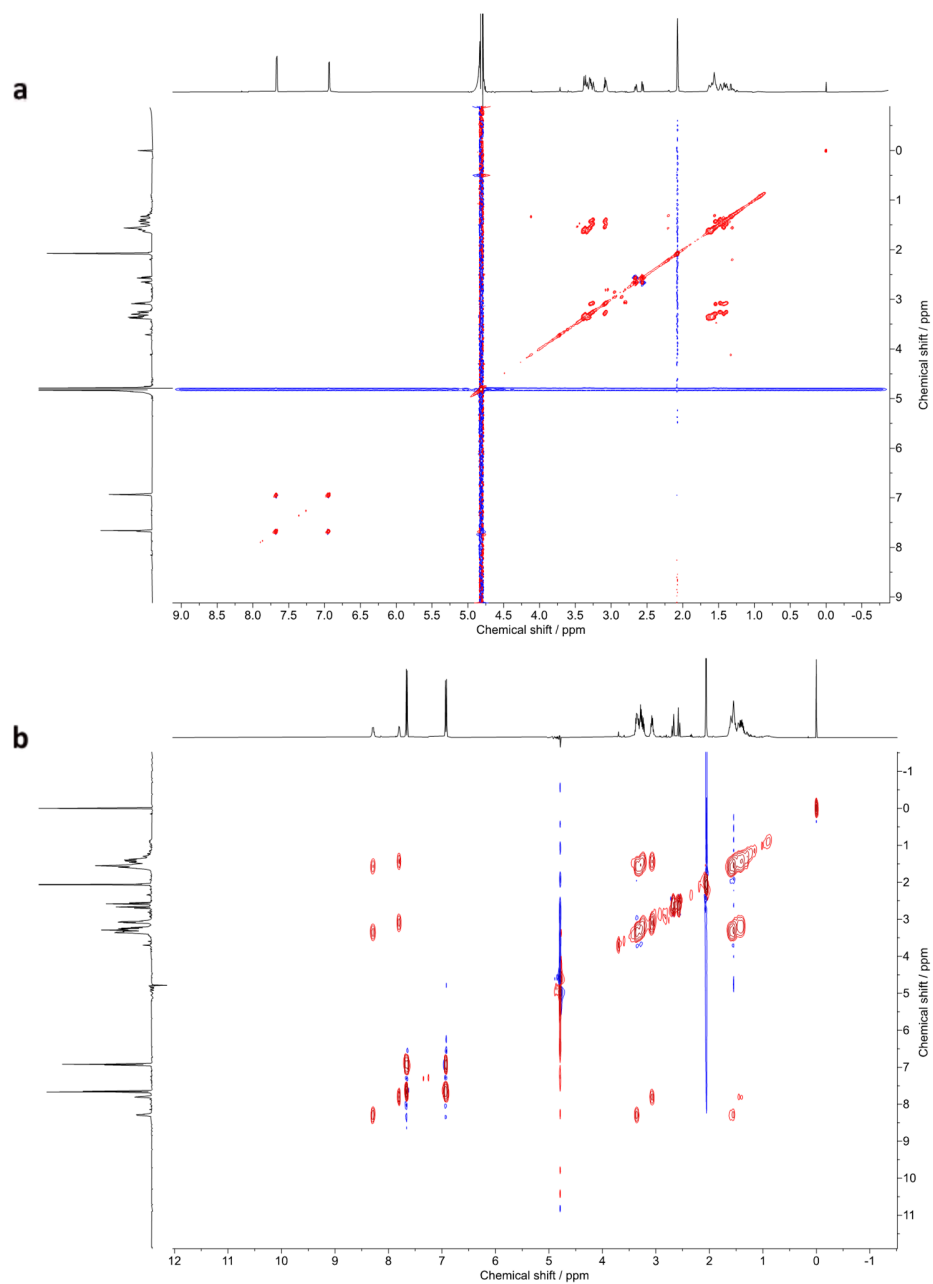

**Figure S9. 2D proton NMR spectra of methylolanthanin. a,** TOCSY spectrum (800 MHz, D<sub>2</sub>O). **b,** TOCSY spectrum (500 MHz, 9:1 H<sub>2</sub>O/D<sub>2</sub>O) measured with water suppression.

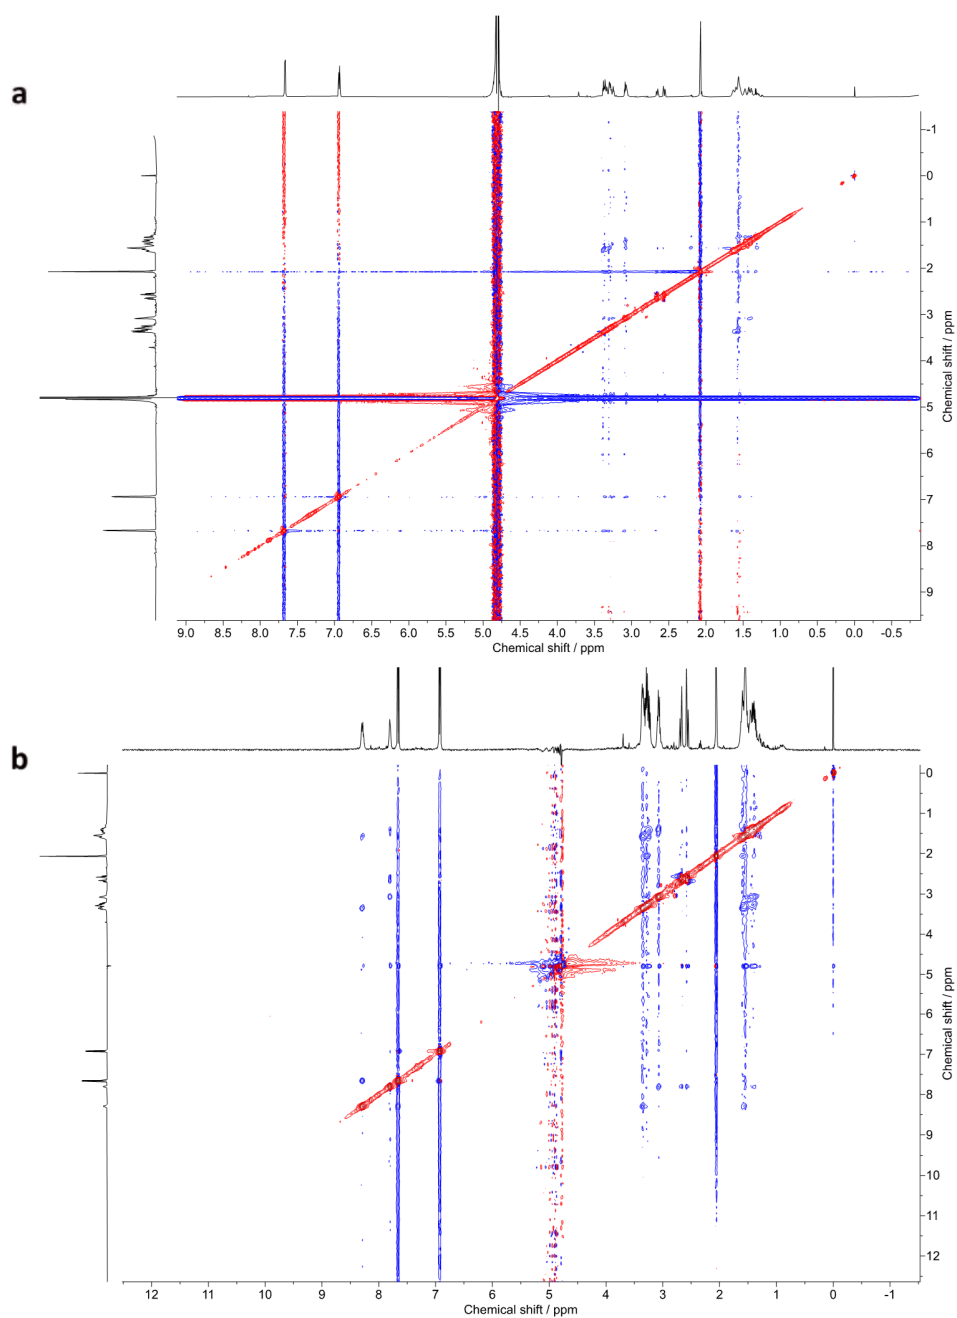

**Figure S10. 2D proton NMR spectra of methylolanthanin. a,** NOESY spectrum (800 MHz, D<sub>2</sub>O). **b,** NOESY spectrum (500 MHz, 9:1 H<sub>2</sub>O/D<sub>2</sub>O) measured with water suppression.

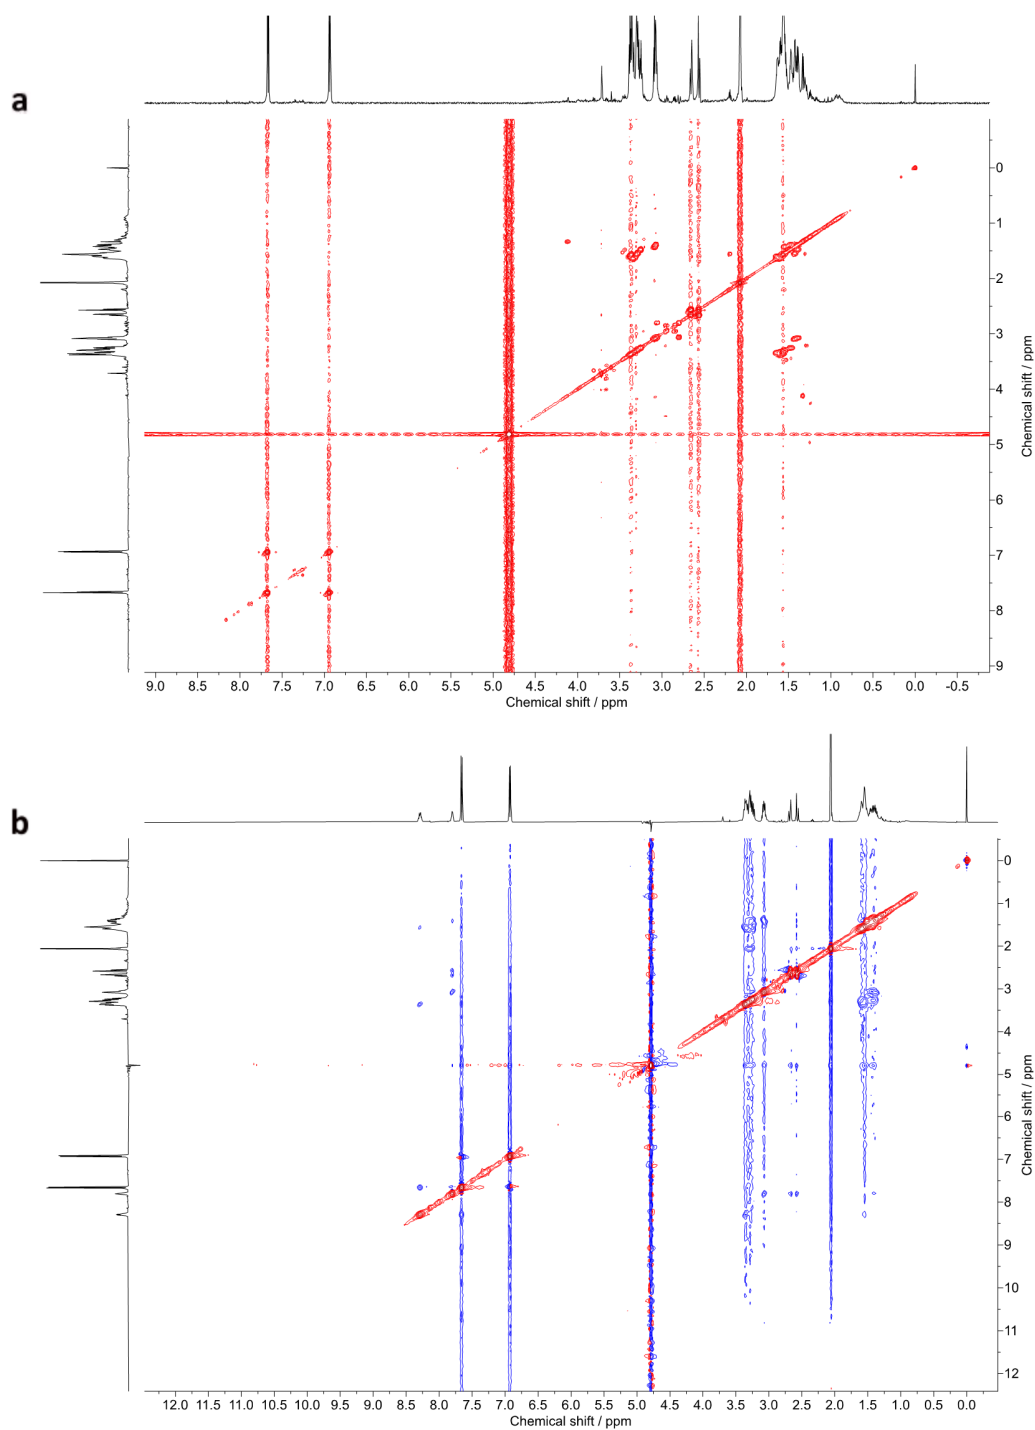

**Figure S11. 2D proton NMR spectra of methylolanthanin. a, COSY spectrum (800 MHz, D<sub>2</sub>O). b, ROESY (500 MHz, 9:1 H<sub>2</sub>O/D<sub>2</sub>O) spectrum measured with water suppression.**

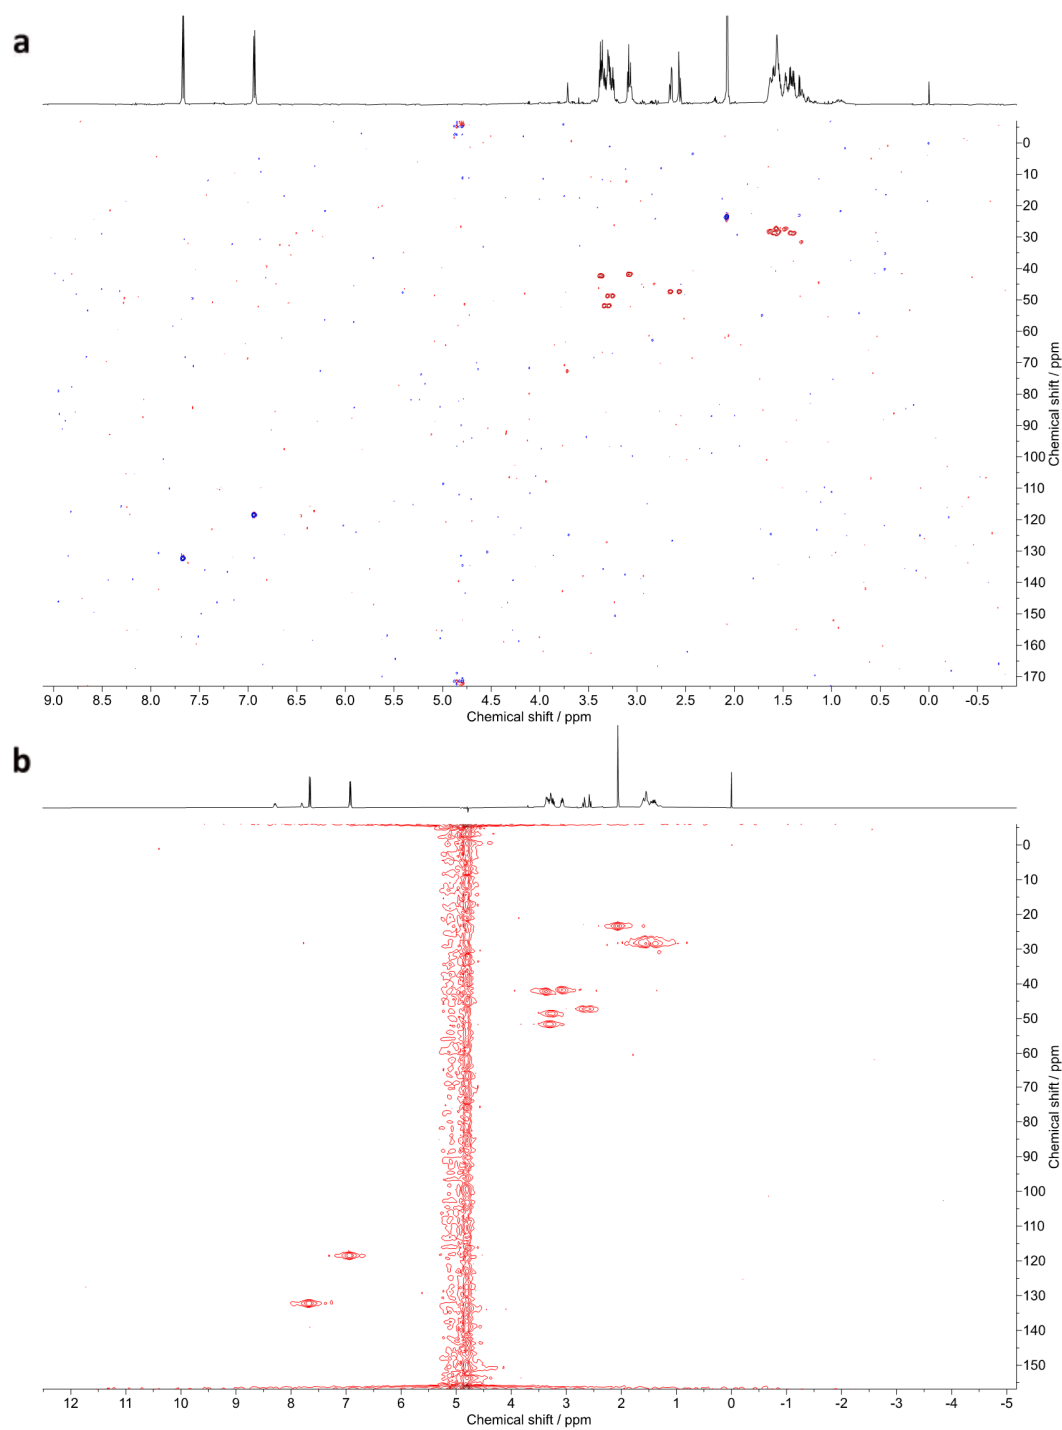

**Figure S12. Heteronuclear  $^1\text{H}$ - $^{13}\text{C}$  2D NMR spectra of methylolanthanin.** **a**, Phase-sensitive HSQC (800 MHz,  $\text{D}_2\text{O}$ ) spectrum **b**, HSQC (500 MHz, 9:1  $\text{H}_2\text{O}/\text{D}_2\text{O}$ ) spectrum measured with water suppression.

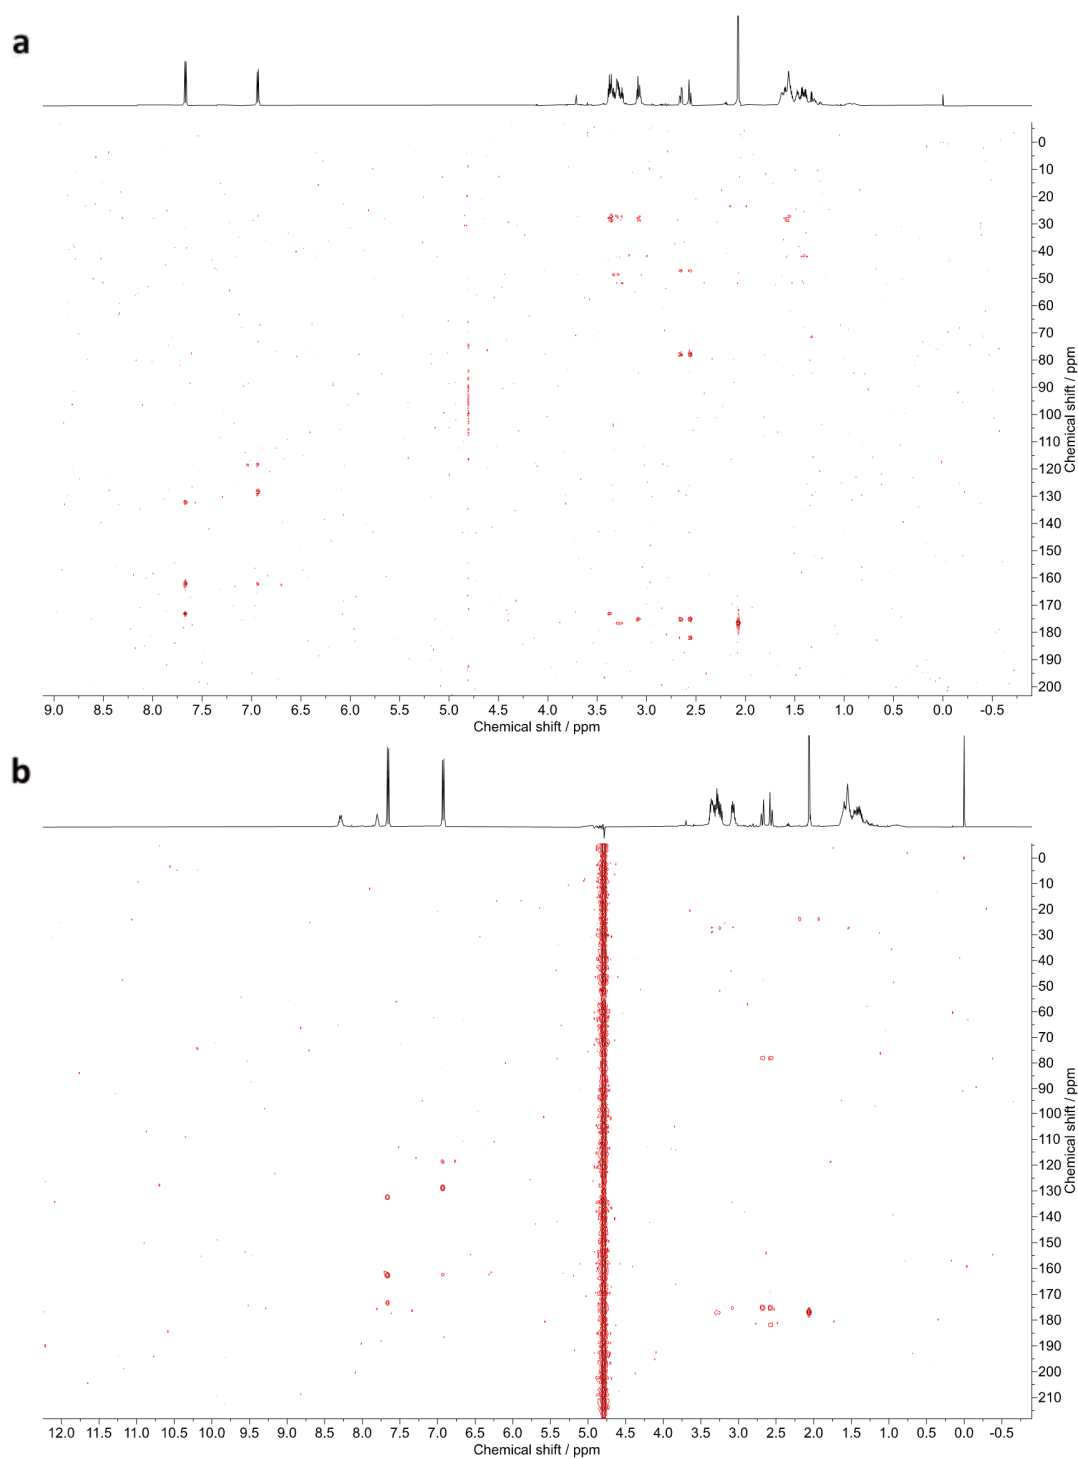

**Figure S13. Heteronuclear  $^1\text{H}$ - $^{13}\text{C}$  2D NMR spectra of methylolanthanin. a, HMBC (800 MHz,  $\text{D}_2\text{O}$ ). b, HMBC (500 MHz, 9:1  $\text{H}_2\text{O}/\text{D}_2\text{O}$ ) spectrum measured with water suppression.**

**Supplementary Table 1. Prevalence of *mII* in *Methylobacteriaceae***

| #Assembly       | Strain                                | AsbABCDE present? |  |
|-----------------|---------------------------------------|-------------------|--|
| GCF_001741865.1 | Bosea vaviloviae Vaf18                | False             |  |
| GCF_004802635.2 | Methylocystis heyeri H2               | False             |  |
| GCF_009363855.1 | Microvirga thermotolerans HR1         | False             |  |
| GCF_016804325.1 | Methylobacterium aquaticum BG2        | True              |  |
| GCF_001548015.1 | Methylobacterium aquaticum MA-22A     | False             |  |
| GCF_021228015.1 | Methylobacterium currus TP-3          | True              |  |
| GCF_003173715.1 | Methylobacterium durans 17SD2-17      | False             |  |
| GCF_029761955.1 | Methylobacterium indicum JDJ13        | False             |  |
| GCF_017347565.1 | Methylobacterium indicum VL1          | False             |  |
| GCF_000364445.2 | Methylobacterium mesophilicum SR1.6/6 | False             |  |
| GCF_029714205.1 | Methylobacterium nodulans CB376       | False             |  |
| GCF_000022085.1 | Methylobacterium nodulans ORS 2060    | False             |  |
| GCF_022533465.1 | Methylobacterium organophilum WPA_B   | False             |  |
| GCF_000757795.1 | Methylobacterium oryzae CBMB20        | False             |  |
| GCF_021398735.1 | Methylobacterium oryzae H33R-06       | False             |  |

|                 |                                            |       |  |
|-----------------|--------------------------------------------|-------|--|
| GCF_001936175.1 | Methylobacterium<br>phyllosphaerae CBMB27  | False |  |
| GCF_003173735.1 | Methylobacterium<br>radiodurans 17Sr1-43   | False |  |
| GCF_000019725.1 | Methylobacterium<br>radiotolerans JCM 2831 | False |  |
| GCF_021484845.1 | Methylobacterium<br>radiotolerans NYY1     | False |  |
| GCF_003173775.1 | Methylobacterium sp.<br>17Sr1-1            | False |  |
| GCF_029691625.1 | Methylobacterium sp.<br>391_Methyba4       | False |  |
| GCF_000019365.1 | Methylobacterium sp. 4-46                  | False |  |
| GCF_001542815.1 | Methylobacterium sp.<br>AMS5               | True  |  |
| GCF_001854385.1 | Methylobacterium sp. C1                    | False |  |
| GCF_025813715.1 | Methylobacterium sp.<br>FF17               | False |  |
| GCF_028583545.1 | Methylobacterium sp.<br>NMS14P             | False |  |
| GCF_008000895.1 | Methylobacterium sp. WL1                   | False |  |
| GCF_003254375.1 | Methylobacterium sp.<br>XJLW               | False |  |
| GCF_023546765.1 | Methylobacterium tardum<br>DSM 19566       | False |  |
| GCF_003173755.1 | Methylobacterium terrae<br>17Sr1-28        | False |  |
| GCF_022179725.1 | Methylorubrum<br>aminovorans NBRC<br>15686 | True  |  |

|                 |                                           |       |                 |
|-----------------|-------------------------------------------|-------|-----------------|
| GCF_000022685.1 | Methylobacterium<br>extorquens AM1        | True  |                 |
| GCF_030062705.1 | Methylobacterium<br>extorquens ATCC 55366 | True  |                 |
| GCF_000021845.1 | Methylobacterium<br>extorquens CM4        | True  |                 |
| GCF_000083545.1 | Methylobacterium<br>extorquens DM4        | True  |                 |
| GCF_026122615.1 | Methylobacterium<br>extorquens NBC_00036  | True  |                 |
| GCF_026122595.1 | Methylobacterium<br>extorquens NBC_00404  | True  |                 |
| GCF_030255395.1 | Methylobacterium<br>extorquens PA1        | True  |                 |
| GCF_000018845.1 | Methylobacterium<br>extorquens PA1        | True  |                 |
| GCF_001971665.1 | Methylobacterium<br>extorquens PSBB040    | True  |                 |
| GCF_900234795.1 | Methylobacterium<br>extorquens TK 0001    | **    | Fragmented AsbC |
| GCF_022179745.1 | Methylobacterium podarium<br>DSM 15083    | True  |                 |
| GCF_000019945.1 | Methylobacterium populi<br>BJ001          | True  |                 |
| GCF_002355515.1 | Methylobacterium populi P-<br>1M          | True  |                 |
| GCF_006740745.1 | Methylobacterium populi YC-<br>XJ1        | True  |                 |
| GCF_014199985.1 | Methylobacterium<br>rhodesianum DSM 5687  | True  |                 |
| GCF_014199935.1 | Methylobacterium rhodinum<br>DSM 2163     | False |                 |

|                 |                                             |       |  |
|-----------------|---------------------------------------------|-------|--|
| GCF_900114375.1 | Methylobacterium salsuginis<br>CGMCC 1.6474 | False |  |
| GCF_021117295.1 | Methylobacterium sp. B1-46                  | True  |  |
| GCF_024347855.1 | Methylobacterium sp. GM97                   | True  |  |
| GCF_022179765.1 | Methylobacterium suomiense<br>DSM 14458     | False |  |
| GCF_022179785.1 | Methylobacterium<br>thiocyanatum JCM 10893  | True  |  |
| GCF_014845115.1 | Methylobacterium zatmanii<br>LMG 6087       | False |  |

**Supplementary Table 2. Primers used in study**

| Primer | Sequence (5' to 3')                            | Plasmid | Product                                                                             |
|--------|------------------------------------------------|---------|-------------------------------------------------------------------------------------|
| AZ09   | ACGAGAAATCTTGCCGTTGGC                          | pMLL    | META1p4132-<br>META1p4133 +<br>first 500 bp of<br>META1p4134                        |
| AZ10   | ATCAACCCGGATCTGCGCC                            | pMLL    | Last 500 bp of<br>META1p4133 +<br>META1p4134-<br>META1p4138                         |
| AZ11   | GAGAACGAGATGACGTTGGA                           | pMLL    | Joint fragment:<br>200 bp HZ848<br>backbone + 200<br>bp pCM66T                      |
| AZ12   | ATTGCCATACCTTTGGTCGTTTTTTAGC<br>CGCTAAAACGG    | pMLL    | Joint fragment:<br>200 bp HZ848<br>backbone + 200<br>bp<br>pCM66T/HZ848<br>backbone |
| AZ13   | CGACCAAAGGTATGGCAATTTAGAAAA<br>ACTCATCGAGCATCA | pMLL    | Joint fragment:<br>200 bp HZ848<br>backbone + 200<br>bp<br>pCM66T/pCM6<br>6T        |
| AZ14   | TCCTTTTAACAGCGATCGCG                           | pMLL    | Joint fragment:<br>200 bp HZ848<br>backbone + 200<br>bp pCM66T                      |
| AZ15   | CATTCGATAAGCCACGAAATATGACCA<br>TGATTACGCCAAG   | pMLL    | Joint fragment:<br>200 bp pCM66T<br>+ 200 bp<br>EPI300<br>backbone                  |
| AZ16   | TTTACCAAGGCATCATTGCATGTAAGC<br>GGATGCCGG       | pMLL    | Joint fragment:<br>200 bp pCM66T<br>+ 200 bp<br>EPI300<br>backbone/pCM6<br>6T       |
| AZ17   | TGCAATGATGCCTTGGTAAAATCTACG<br>TCTGTCGAGAAGT   | pMLL    | Joint fragment:<br>200 bp pCM66T                                                    |

|      |                                                 |      |                                                                                                                               |
|------|-------------------------------------------------|------|-------------------------------------------------------------------------------------------------------------------------------|
|      |                                                 |      | + 200 bp<br>EPI300<br>backbone/EPI300 backbone                                                                                |
| AZ18 | TTGATATCGGGGGTTAGTTCG                           | pMLL | Joint fragment:<br>200 bp pCM66T<br>+ 200 bp<br>EPI300<br>backbone                                                            |
| AZ19 | GTGTTACCCTTGTTACACCGT                           | pMLL | Joint fragment:<br>200 bp pCM66T<br>+ 200 bp<br>EPI300<br>backbone                                                            |
| AZ20 | TGAATTGGACTTAACGATTCAGGGCAC<br>CAATAACTGCCT     | pMLL | Joint fragment:<br>200 bp EPI300<br>backbone + first<br>200 bp<br>META1p4132                                                  |
| AZ21 | GAATCGTTAAGTCCAATTCAGATCATG<br>CCACCCTCGTCTC    | pMLL | Joint fragment:<br>200 bp EPI300<br>backbone + first<br>200 bp<br>META1p4132/E<br>PI300 backbone                              |
| AZ22 | ATGAAGCCGGTTGCCGTATC                            | pMLL | META1p4132-<br>META1p4133 +<br>first 500 bp of<br>META1p4134                                                                  |
| AZ23 | CTCGTTGGCGGTCTGGTCG                             | pMLL | Joint fragment:<br>last 200 bp<br>META1p4138 +<br>200 bp HZ848<br>backbone                                                    |
| AZ24 | GTAGATTCGGCATTAGGCAACGGTTGC<br>CACCTTTCGGGAC    | pMLL | Last 500 bp of<br>META1p4133 +<br>META1p4134-<br>META1p4138/joint<br>fragment:<br>last 200 bp<br>META1p4138 +<br>200 bp HZ848 |
| AZ25 | TTGCCTAATGCCGAATCTACGAGGCCA<br>AAAAGCTCGCTTTCAG | pMLL | Joint fragment:<br>last 200 bp<br>META1p4138+200 bp HZ848                                                                     |

|       |                                                 |      |                                                                            |
|-------|-------------------------------------------------|------|----------------------------------------------------------------------------|
|       |                                                 |      | backbone/HZ84<br>8 backbone                                                |
| AZ26  | TGCCGGCACGTTAACCG                               | pMLL | Joint fragment:<br>last 200 bp<br>META1p4138 +<br>200 bp HZ848<br>backbone |
| AZ27  | ATTTCTGGCTTATCGAATGAACAAAC<br>CACCGCTGGTAGC     | pMLL | AM1 backbone                                                               |
| MS25  | ACTTGGTCTGACAGTTACCATCTCCCC<br>GCATATCGACTAC    | pMS2 | <i>mll</i> upstream<br>flank                                               |
| MS26  | TAGGAGCCGTGGATGTTAAG                            | pMS2 | <i>mll</i> upstream<br>flank                                               |
| MS27  | AACGTGACCATACGGGCCATTGAATCC<br>CGGCAGCAAACCC    | pMS2 | <i>mll</i> downstream<br>flank                                             |
| MS28  | GACACCGACAACCTGCACATTAGGAGC<br>CGTGGATGTTAAGG   | pMS2 | <i>mll</i> downstream<br>flank                                             |
| MS29  | CTTAACATCCACGGCTCCTAATGTGCA<br>GGTTGTCGGTGTC    | pMS2 | pCM433kanT<br>backbone                                                     |
| MS30  | GTAGTCGATATGCGGGGAGATGGTAA<br>CTGTCAGACCAAGT    | pMS2 | pCM433kanT<br>backbone                                                     |
| AZ195 | TGATGCTCTAGACATGATCTTCGAAAC<br>CTCCTG           | pAZ6 | <i>mll</i> promoter                                                        |
| AZ196 | GCTGCCGGGATTTCAGGAGCCGCTGTT<br>CATTCCGGTATTGGCT | pAZ6 | <i>mll</i> promoter                                                        |
